# Supplementary material for: Comparative lipidomic profiling of the human commensal bacteriumPropionibacterium acnesand its extracellular vesicles
Source: Royal Society of Chemistry journal article supplement (doi:10.1039/c7ra13769a), 2018-01-01
Supplement: c7ra13769a1.pdf [file c7ra13769a1.pdf]

## Electronic Supplementary Information

# Comparative Lipidomic Profiling of the Human Commensal Bacterium *Propionibacterium acnes* and Its Extracellular Vesicles

Jinseong Jeon<sup>a†</sup>, Seung Cheol Park<sup>b†</sup>, Jin Her<sup>c</sup>, Jae Won Lee<sup>b</sup>, Jin-Kwan Han<sup>a</sup>, Yoon-Keun Kim<sup>d</sup>, Kwang Pyo Kim<sup>b</sup>  
and Changill Ban<sup>\*c</sup>

---

<sup>a</sup> Department of Life Sciences, Pohang University of Science and Technology (POSTECH), 77, Cheongam-Ro, Nam-Gu, Pohang, Gyeongbuk, Republic of Korea, 37673.

<sup>b</sup> Department of Applied Chemistry, College of Applied Science, Kyung Hee University, Yongin, Republic of Korea, 17104.

<sup>c</sup> Department of Chemistry, Pohang University of Science and Technology (POSTECH), 77, Cheongam-Ro, Nam-Gu, Pohang, Gyeongbuk, Republic of Korea, 37673.

<sup>d</sup> Myeoungdo Medical, Woori Technology Building, World Cup buk-ro 56-gil 9, Mapo-gu, Seoul, Republic of Korea, 03923.

**Supplementary table 1. Identified lipids in *P. acnes* EV and *P. acnes*.**

|          | <i>P. acnes</i> EV   |                      |                      | <i>P. acnes</i>    |                    |                    |
|----------|----------------------|----------------------|----------------------|--------------------|--------------------|--------------------|
|          | <i>P. acnes</i> EV-1 | <i>P. acnes</i> EV-2 | <i>P. acnes</i> EV-3 | <i>P. acnes</i> -1 | <i>P. acnes</i> -2 | <i>P. acnes</i> -3 |
| TG(42:0) | 0.3172               | 0.2647               | 0.2855               | 0.5130             | 0.4559             | 0.5059             |
| TG(44:0) | 1.6806               | 1.3109               | 1.6027               | 2.6902             | 2.3432             | 2.2357             |
| TG(44:1) | 0.4398               | 0.4079               | 0.4599               | 0.8924             | 0.8482             | 0.8640             |
| TG(46:0) | 4.0872               | 3.8035               | 4.0869               | 4.4333             | 4.0126             | 4.1492             |
| TG(46:1) | 1.1643               | 1.1073               | 1.1868               | 2.5543             | 2.3802             | 2.5672             |
| TG(46:2) | 0.2787               | 0.3002               | 0.2995               | 0.5500             | 0.5675             | 0.4898             |
| TG(48:0) | 1.3127               | 1.3441               | 1.2993               | 1.5674             | 1.4512             | 1.4830             |
| TG(48:1) | 9.0582               | 9.0506               | 9.9802               | 12.1707            | 11.4147            | 11.7140            |
| TG(48:2) | 1.6051               | 1.6494               | 1.9005               | 3.0092             | 2.7914             | 2.8091             |
| TG(48:3) | 0.4393               | 0.4476               | 0.4584               | 1.4022             | 1.1726             | 1.2366             |
| TG(50:0) | 12.7770              | 12.1687              | 12.8853              | 13.2924            | 11.6570            | 11.9954            |
| TG(50:1) | 13.8153              | 12.5544              | 15.2997              | 20.6210            | 19.1421            | 19.8126            |
| TG(50:2) | 11.4086              | 12.5538              | 12.7587              | 12.2915            | 11.5546            | 12.3059            |
| TG(50:3) | 2.9061               | 2.9232               | 3.2848               | 2.8832             | 2.8741             | 2.9140             |
| TG(50:4) | 0.1271               | 0.1552               | 0.1143               | 0.2651             | 0.2618             | 0.2743             |
| TG(52:0) | 0.0042               | 0.0038               | 0.0072               | ND                 | ND                 | ND                 |
| TG(52:0) | 5.2903               | 4.7309               | 5.0122               | 5.1168             | 4.6051             | 5.0091             |
| TG(52:1) | 3.8539               | 3.0947               | 4.0214               | 4.7799             | 4.4423             | 4.7605             |
| TG(52:2) | 10.1855              | 11.0357              | 13.0046              | 9.5696             | 9.0624             | 9.4000             |
| TG(52:3) | 6.6449               | 7.5463               | 8.0244               | 4.7918             | 4.8680             | 5.0522             |
| TG(52:4) | 1.2920               | 1.3380               | 1.4123               | 1.4596             | 1.3814             | 1.4526             |
| TG(52:5) | 0.1893               | 0.1332               | 0.1817               | 0.1533             | 0.1411             | 0.1871             |
| TG(54:0) | 5.6526               | 4.1744               | 5.3569               | 7.2505             | 6.2980             | 6.5935             |
| TG(54:1) | 2.1972               | 1.6794               | 2.3850               | 2.7185             | 2.3858             | 2.5473             |
| TG(54:2) | 4.5418               | 3.7706               | 4.8832               | 4.3005             | 3.9046             | 4.0699             |
| TG(54:3) | 23.1530              | 21.7111              | 25.2237              | 12.0614            | 11.4741            | 12.0306            |
| TG(54:4) | 4.7470               | 4.3592               | 4.8539               | 3.1663             | 3.0536             | 3.0441             |
| TG(54:5) | 2.4820               | 2.2279               | 2.5052               | 2.3522             | 2.1859             | 2.4077             |
| TG(54:6) | 1.5644               | 1.2866               | 1.5667               | 1.7833             | 1.7220             | 1.6946             |
| TG(54:7) | 0.3973               | 0.4704               | 0.3460               | 0.3038             | 0.3300             | 0.2270             |
| TG(58:0) | 0.1584               | 0.1782               | 0.1516               | 0.1781             | 0.1801             | 0.1416             |
| TG(58:1) | 0.3809               | 0.3727               | 0.3313               | 0.4820             | 0.4187             | 0.2664             |
| TG(58:2) | 0.4500               | 0.4861               | 0.3935               | 0.4654             | 0.4804             | 0.2352             |
| TG(58:3) | 0.1286               | 0.1630               | 0.1272               | 0.1411             | 0.1239             | 0.0791             |
| TG(58:4) | 0.1092               | 0.1702               | 0.1400               | 0.1041             | 0.0871             | 0.0493             |
| TG(58:5) | 0.1146               | 0.1240               | 0.1006               | 0.0957             | 0.0891             | 0.0365             |
| TG(58:6) | 0.0103               | 0.0160               | 0.0094               | 0.0117             | 0.0117             | 0.0165             |
| TG(58:8) | 0.0132               | 0.0312               | 0.0096               | ND                 | ND                 | ND                 |

|                    |         |         |         |         |        |        |
|--------------------|---------|---------|---------|---------|--------|--------|
| TG(60:0)           | 0.0540  | 0.0585  | 0.0463  | 0.0671  | 0.0477 | 0.0304 |
| TG(60:1)           | 0.1127  | 0.1166  | 0.0815  | 0.1002  | 0.1106 | 0.0576 |
| TG(60:2)           | 0.0862  | 0.0902  | 0.0810  | 0.0867  | 0.0944 | 0.0494 |
| TG(60:3)           | 0.0583  | 0.0627  | 0.0541  | 0.0821  | 0.0555 | 0.0388 |
| TG(60:4)           | 0.0182  | 0.0237  | 0.0222  | ND      | ND     | ND     |
| TG(62:0)           | 0.0084  | 0.0088  | 0.0071  | 0.0142  | 0.0169 | 0.0061 |
| TG(62:3)           | 0.0103  | 0.0160  | 0.0163  | 0.0103  | 0.0052 | 0.0034 |
| TG(64:0)           | 0.0070  | 0.0084  | 0.0084  | 0.0102  | 0.0124 | 0.0081 |
| TG(56:0)           | 0.8133  | 0.8671  | 0.7452  | 1.1734  | 1.0411 | 0.6806 |
| TG(56:1)           | 0.9760  | 1.0947  | 0.8761  | 1.4788  | 1.3294 | 0.7555 |
| TG(56:2)           | 1.1187  | 1.2211  | 0.9040  | 1.3178  | 1.2305 | 0.7155 |
| TG(56:3)           | 0.8551  | 0.9409  | 0.8513  | 0.5565  | 0.5371 | 0.3543 |
| TG(56:4)           | 0.2343  | 0.3091  | 0.2746  | 0.1388  | 0.1498 | 0.0692 |
| TG(56:5)           | 0.2729  | 0.3483  | 0.3225  | 0.1972  | 0.1515 | 0.0821 |
| TG(56:6)           | 0.0912  | 0.0980  | 0.0820  | 0.0486  | 0.0389 | 0.0401 |
| TG(52:1)           | ND      | ND      | ND      | 0.0056  | 0.0064 | 0.0074 |
| TG(54:6)           | ND      | ND      | ND      | 0.0576  | 0.0457 | 0.0519 |
| TG(60:2)           | ND      | ND      | ND      | 0.0149  | 0.0092 | 0.0081 |
| TG(62:0)           | ND      | ND      | ND      | 0.0094  | 0.0089 | 0.0117 |
| TG(64:1)           | ND      | ND      | ND      | 0.0081  | 0.0076 | 0.0042 |
| SA1P(d14:1)        | 0.6047  | 0.6314  | 0.8550  | 1.3534  | 1.1377 | 1.3641 |
| SA1P(d18:1)        | 1.4882  | 3.5429  | 4.1734  | 0.1224  | 0.0408 | 0.2172 |
| SO1P(d14:1)        | 0.1965  | 0.1924  | 0.1871  | 0.5210  | 0.4699 | 0.8010 |
| SO1P(d16:1)        | 0.4939  | 0.5100  | 0.5175  | 0.3417  | 0.3880 | 0.4668 |
| SO1P(d18:1)        | 2.0492  | 2.4138  | 2.7224  | 3.6134  | 3.5792 | 4.9541 |
| dCer1P(d18:1-14:0) | 0.9282  | 1.0542  | 0.7043  | 0.5547  | 0.7020 | 1.2191 |
| dCer1P(d18:1-18:3) | 0.2320  | 0.4036  | 0.4739  | 0.6336  | 0.6446 | 0.4871 |
| dCer1P(d18:1-20:3) | 1.4530  | 0.8675  | 1.1609  | 0.6819  | 0.4592 | 0.5461 |
| dCer(d14:1-16:1)   | 8.3425  | 7.3795  | 6.7826  | 12.4427 | 5.4084 | 8.9888 |
| Cholesterol        | 0.0980  | 0.1320  | 0.2060  | 0.1470  | 0.1230 | 0.1110 |
| ChE(16:1)          | 0.1000  | 0.1690  | 0.1270  | 0.1990  | 0.1460 | 0.1650 |
| ChE(16:0)          | 0.0660  | 0.0740  | 0.0620  | 0.0540  | 0.0480 | 0.0410 |
| ChE(18:2)          | 0.0680  | 0.1020  | 0.1100  | 0.0460  | 0.0370 | 0.0280 |
| ChE(18:1)          | 0.0850  | 0.1860  | 0.1830  | 0.1000  | 0.0670 | 0.0940 |
| ChE(18:0)          | 0.0360  | 0.0420  | 0.0720  | 0.0190  | 0.0230 | 0.0140 |
| ChE(20:2)          | 0.0100  | 0.0070  | 0.0090  | 0.0090  | 0.0090 | 0.0110 |
| ChE(20:1)          | 0.0120  | 0.0100  | 0.0200  | 0.0240  | 0.0120 | 0.0070 |
| ChE(20:0)          | 0.0200  | 0.0230  | 0.0310  | 0.0220  | 0.0170 | 0.0120 |
| ChE(24:1)          | 0.0120  | 0.0200  | 0.0250  | 0.0370  | 0.0220 | 0.0280 |
| ChE(24:0)          | 0.0180  | 0.0320  | 0.0240  | 0.0360  | 0.0240 | 0.0420 |
| DG(30:0)           | 16.5740 | 14.6230 | 16.6000 | 1.9660  | 1.9490 | 2.0650 |
| DG(30:1)           | 0.0600  | 0.0540  | 0.0530  | 0.0140  | 0.0120 | 0.0120 |

|           |          |          |          |          |          |          |
|-----------|----------|----------|----------|----------|----------|----------|
| DG(32:0)  | 15.2780  | 12.7360  | 15.5000  | 6.6640   | 5.5900   | 6.7970   |
| DG(32:1)  | 0.0970   | 0.1270   | 0.1110   | 0.0230   | 0.0210   | 0.0310   |
| DG(32:2)  | 0.1170   | 0.1100   | 0.1130   | 0.0070   | 0.0060   | 0.0060   |
| DG(34:0)  | 9.7220   | 8.0660   | 9.8100   | 7.8530   | 6.5640   | 8.0000   |
| DG(34:1)  | 0.1440   | 0.2240   | 0.1920   | 0.0620   | 0.0550   | 0.0660   |
| DG(34:2)  | 0.0940   | 0.1270   | 0.0930   | 0.0190   | 0.0220   | 0.0230   |
| DG(34:3)  | 0.0300   | 0.0400   | 0.0320   | 0.0040   | 0.0050   | 0.0060   |
| DG(36:0)  | 5.6940   | 4.1390   | 5.3600   | 4.6720   | 4.0430   | 4.7970   |
| DG(36:1)  | 0.0560   | 0.0520   | 0.0620   | 0.0170   | 0.0170   | 0.0200   |
| DG(36:2)  | 0.0740   | 0.1070   | 0.0850   | 0.0320   | 0.0300   | 0.0270   |
| DG(36:3)  | 0.0390   | 0.0550   | 0.0430   | 0.0160   | 0.0140   | 0.0150   |
| DG(36:4)  | 0.0260   | 0.0330   | 0.0260   | 0.0130   | 0.0100   | 0.0120   |
| DG(38:0)  | 0.1190   | 0.1050   | 0.1070   | 0.0930   | 0.0850   | 0.1160   |
| DG(38:4)  | 0.0380   | 0.0350   | 0.0390   | 0.0330   | 0.0340   | 0.0350   |
| DG(40:0)  | 0.0310   | 0.0250   | 0.0350   | 0.0230   | 0.0290   | 0.0270   |
| DG(40:4)  | 0.1020   | 0.0910   | 0.1010   | 0.0900   | 0.0760   | 0.0940   |
| DG(42:0)  | 0.0330   | 0.0330   | 0.0350   | 0.0230   | 0.0200   | 0.0230   |
| DG(42:4)  | 0.0570   | 0.0500   | 0.0540   | 0.0540   | 0.0460   | 0.0530   |
| MG(14:0)  | 2.1370   | 1.7690   | 3.2120   | 1.6900   | 1.6040   | 1.2940   |
| MG(16:0)  | 211.6750 | 189.3520 | 266.6670 | 147.3870 | 195.4170 | 101.7060 |
| MG(18:4)  | 0.5480   | 0.4860   | 0.8420   | 0.6240   | 0.4710   | 0.5490   |
| MG(18:3)  | 0.9490   | 1.0830   | 1.2790   | 0.7320   | 0.9290   | 0.7300   |
| MG(18:2)  | 1.1170   | 1.1900   | 1.5580   | 0.7700   | 0.9290   | 0.6380   |
| MG(18:1)  | 8.4260   | 7.1760   | 10.9090  | 7.3870   | 7.7920   | 7.2010   |
| MG(18:0)  | 261.4210 | 238.8890 | 318.7880 | 210.8010 | 210.0000 | 155.2900 |
| MG(20:2)  | 1.6290   | 1.5600   | 2.0300   | 0.8150   | 0.9960   | 0.9900   |
| MG(20:1)  | 10.9140  | 10.7410  | 16.2420  | 10.2090  | 11.7500  | 10.3410  |
| MG(20:0)  | 2.9440   | 2.5230   | 2.6790   | 2.0520   | 1.8210   | 2.0380   |
| MG(22:5)  | 7.6650   | 7.1300   | 9.5150   | 4.4250   | 4.9170   | 4.4370   |
| MG(22:2)  | 0.6700   | 0.5790   | 0.8180   | 0.5710   | 0.7290   | 0.6350   |
| MG(22:1)  | 0.5010   | 0.5000   | 0.6610   | 0.5160   | 0.5540   | 0.4230   |
| MG(24:1)  | 0.3410   | 0.2500   | 0.4460   | 0.2600   | 0.2830   | 0.2480   |
| PA(28:0)  | 0.7171   | 0.3124   | 0.3682   | 0.0264   | 0.0210   | 0.0100   |
| PA(28:5)  | 0.1105   | 0.1584   | 0.1113   | 0.0777   | 0.0650   | 0.1288   |
| PA(30:0)  | 15.4264  | 7.9562   | 8.1026   | 2.8220   | 2.4667   | 0.7834   |
| PA(30:1)  | 2.2984   | 1.5474   | 1.4205   | 0.0289   | 0.0217   | 0.0128   |
| PA(32:0)  | 0.4767   | 0.2343   | 0.2133   | 0.0113   | 0.0107   | 0.0112   |
| PA(32:1)  | 0.5310   | 0.2073   | 0.2795   | 0.0096   | 0.0078   | 0.0118   |
| PA(34:1)  | 0.6977   | 0.2526   | 0.3154   | 0.0066   | 0.0039   | 0.0124   |
| PA(36:1)  | 0.9651   | 0.3759   | 0.2656   | 0.0061   | 0.0039   | ND       |
| PA(38:1)  | 0.7326   | 0.1777   | 0.1533   | 0.0042   | ND       | ND       |
| LPA(14:0) | 13.9781  | 11.5753  | 15.9036  | 5.4682   | 6.4734   | 6.6536   |
| LPA(16:0) | 7.9197   | 6.7808   | 7.0683   | 4.4816   | 4.0902   | 3.8356   |

|           |        |        |        |        |        |        |
|-----------|--------|--------|--------|--------|--------|--------|
| LPA(16:1) | 2.8540 | 2.5411 | 1.7028 | 1.2358 | 1.1884 | 1.2133 |
| LPA(18:0) | 2.1350 | 1.5103 | 1.5944 | 1.4833 | 1.4332 | 0.7730 |
| LPA(18:1) | 1.4307 | 1.1781 | 1.3092 | 0.7759 | 0.7536 | 0.8943 |
| LPA(18:2) | 0.4489 | 0.4452 | 0.5703 | 0.6254 | 0.5668 | 0.5812 |
| LPA(20:2) | 1.2226 | 0.9315 | 0.8273 | 1.0903 | 1.0676 | 1.0098 |
| LPC(16:0) | 0.0243 | 0.0204 | 0.0204 | 0.0196 | 0.0163 | 0.0180 |
| LPC(16:1) | 0.0034 | 0.0032 | 0.0036 | 0.0007 | 0.0006 | 0.0006 |
| LPC(18:0) | 0.0106 | 0.0115 | 0.0106 | 0.0081 | 0.0067 | 0.0073 |
| LPC(18:1) | 0.0124 | 0.0111 | 0.0120 | 0.0020 | 0.0023 | 0.0017 |
| LPC(18:2) | 0.0031 | 0.0026 | 0.0033 | 0.0014 | 0.0011 | 0.0017 |
| LPC(24:1) | 0.0016 | 0.0020 | 0.0016 | 0.0014 | 0.0010 | 0.0008 |
| PC(28:0)  | 0.0119 | 0.0119 | 0.0128 | 0.0003 | 0.0003 | 0.0002 |
| PC(28:1)  | 0.0138 | 0.0121 | 0.0132 | 0.0010 | 0.0009 | 0.0007 |
| PC(30:0)  | 0.0305 | 0.0303 | 0.0358 | 0.0021 | 0.0018 | 0.0020 |
| PC(30:1)  | 0.3844 | 0.3918 | 0.4345 | 0.0004 | 0.0004 | 0.0002 |
| PC(30:2)  | 0.0051 | 0.0043 | 0.0048 | ND     | ND     | ND     |
| PC(32:0)  | 0.0140 | 0.0152 | 0.0153 | 0.0020 | 0.0028 | 0.0025 |
| PC(32:1)  | 0.0389 | 0.0400 | 0.0448 | 0.0028 | 0.0027 | 0.0029 |
| PC(32:2)  | 0.0318 | 0.0327 | 0.0330 | 0.0005 | 0.0005 | 0.0005 |
| PC(34:0)  | 0.0071 | 0.0073 | 0.0086 | 0.0017 | 0.0020 | 0.0016 |
| PC(34:1)  | 0.0912 | 0.0918 | 0.0972 | 0.0042 | 0.0043 | 0.0054 |
| PC(34:2)  | 0.1551 | 0.1469 | 0.1745 | 0.0023 | 0.0026 | 0.0026 |
| PC(34:3)  | 0.0028 | 0.0029 | 0.0029 | 0.0004 | 0.0003 | 0.0004 |
| PC(36:0)  | 0.0098 | 0.0094 | 0.0112 | 0.0021 | 0.0019 | 0.0025 |
| PC(36:1)  | 0.0206 | 0.0239 | 0.0278 | 0.0009 | 0.0012 | 0.0010 |
| PC(36:2)  | 0.0471 | 0.0497 | 0.0559 | 0.0023 | 0.0020 | 0.0023 |
| PC(36:3)  | 0.0113 | 0.0114 | 0.0129 | 0.0007 | 0.0008 | 0.0009 |
| PC(36:4)  | 0.0076 | 0.0074 | 0.0084 | 0.0008 | 0.0007 | 0.0008 |
| PC(36:5)  | 0.0017 | 0.0019 | 0.0017 | ND     | ND     | ND     |
| PC(38:1)  | 0.1660 | 0.1605 | 0.1648 | 0.0028 | 0.0025 | 0.0026 |
| PC(38:2)  | 0.0803 | 0.0755 | 0.0807 | 0.0024 | 0.0020 | 0.0024 |
| PC(38:3)  | 0.0077 | 0.0078 | 0.0080 | 0.0005 | 0.0005 | 0.0005 |
| PC(38:4)  | 0.0011 | 0.0011 | 0.0014 | 0.0002 | 0.0003 | 0.0003 |
| PC(40:1)  | 0.0049 | 0.0051 | 0.0055 | ND     | ND     | ND     |
| PC(40:2)  | 0.0032 | 0.0036 | 0.0037 | ND     | ND     | ND     |
| PE(34:0)  | 0.0002 | 0.0003 | 0.0002 | 0.0001 | 0.0001 | 0.0001 |
| PE(34:1)  | 0.0019 | 0.0017 | 0.0019 | 0.0002 | ND     | 0.0001 |
| PE(34:2)  | 0.0170 | 0.0161 | 0.0159 | 0.0001 | 0.0001 | 0.0001 |
| PE(36:1)  | 0.0003 | 0.0005 | 0.0005 | 0.0001 | 0.0002 | 0.0001 |
| PE(36:2)  | 0.0017 | 0.0020 | 0.0015 | 0.0001 | ND     | 0.0001 |
| PE(36:3)  | 0.0006 | 0.0007 | 0.0003 | 0.0001 | 0.0001 | 0.0001 |
| PE(36:4)  | 0.0006 | 0.0007 | 0.0007 | ND     | ND     | ND     |
| PE(36:5)  | 0.0003 | 0.0003 | 0.0002 | ND     | ND     | ND     |

|                 |          |          |          |          |          |         |
|-----------------|----------|----------|----------|----------|----------|---------|
| LPE(18:2)       | 0.0006   | 0.0010   | 0.0007   | 0.0010   | 0.0011   | 0.0012  |
| LPE(20:0)       | 0.0036   | 0.0032   | 0.0053   | 0.0045   | 0.0048   | 0.0034  |
| LPE(20:1)       | 0.0008   | 0.0012   | 0.0007   | 0.0009   | 0.0012   | 0.0015  |
| LPE(22:0)       | 0.0058   | 0.0053   | 0.0070   | 0.0075   | 0.0064   | 0.0053  |
| LPE(18:1)       | ND       | ND       | ND       | 0.0008   | 0.0020   | 0.0011  |
| LPE(20:2)       | ND       | ND       | ND       | 0.0019   | 0.0012   | 0.0014  |
| PG(28:0)        | 172.8810 | 24.8230  | 14.9180  | 125.2940 | 44.8430  | 0.8820  |
| PG(28:4)        | 0.3170   | 0.2420   | 0.3010   | 0.5230   | 0.3550   | 0.2750  |
| LPG(16:0)       | 0.5720   | 0.5970   | 0.5760   | 0.5650   | 0.9740   | 0.8210  |
| LPG(18:0)       | 0.5350   | 0.5510   | 0.5590   | 0.2720   | 0.5120   | 0.2950  |
| LPG(18:1)       | 0.4950   | 0.6190   | 0.6330   | 0.3340   | 0.7410   | 0.3460  |
| LPG(18:2)       | 2.5520   | 5.5510   | 3.8290   | 1.4900   | 4.3310   | 3.0360  |
| LPG(20:2)       | 0.1510   | 0.2220   | 0.2430   | 0.2720   | 0.3490   | 0.4870  |
| LPG(20:3)       | 0.5350   | 0.4210   | 0.4690   | 0.4460   | 0.4770   | 0.4770  |
| LPG(22:0)       | 0.2360   | 0.2860   | 0.3260   | 0.2310   | 0.5060   | 0.3340  |
| LPG(22:2)       | 0.1990   | 0.2310   | 0.1880   | 0.3340   | 0.3430   | 0.3660  |
| LPG(22:3)       | 0.6620   | 0.4280   | 0.3800   | 0.4020   | 0.4450   | 0.2300  |
| PI(32:0)        | 0.3000   | 0.4341   | 0.2958   | ND       | 0.0496   | ND      |
| PI(30:0)        | 1.4634   | 1.5015   | 1.3921   | 0.0575   | 0.0515   | 0.0558  |
| LPI(14:0)       | 0.3525   | 0.6801   | 0.6377   | 0.5769   | 0.5498   | 0.4242  |
| LPI(16:0)       | 0.5550   | 0.6539   | 0.6833   | 0.6474   | 0.4084   | 0.4659  |
| LPI(18:0)       | 0.1915   | 0.4553   | 0.3974   | 0.4712   | 0.3473   | 0.4280  |
| LPI(18:3)       | 0.1740   | 0.3135   | 0.2044   | 0.5160   | 0.4855   | 0.5909  |
| PS(28:0)        | 468.5908 | 139.2523 | 151.8193 | 590.9091 | 356.8075 | 68.1818 |
| PS(28:1)        | 0.0942   | ND       | ND       | 0.1159   | 0.0330   | ND      |
| PS(28:4)        | 0.1455   | 0.0808   | 0.0831   | 0.3545   | 0.2504   | 0.3056  |
| PS(32:5)        | 0.0718   | 0.0157   | 0.0258   | 0.1025   | 0.0776   | 0.1217  |
| PS(34:3)        | 0.2869   | 0.2065   | 0.1907   | 0.5636   | 0.3584   | 0.6136  |
| LPS(14:0)       | 0.6220   | 0.6571   | 0.5944   | 0.8966   | 0.7494   | 1.1568  |
| LPS(16:0)       | 0.3780   | 0.4199   | 0.3992   | 0.3289   | 0.2530   | 0.1962  |
| LPS(16:1)       | 3.2622   | 4.4231   | 3.3976   | 2.9178   | 2.5059   | 1.7839  |
| LPS(18:1)       | 1.4055   | 1.0064   | 1.2450   | 1.3899   | 1.3310   | 1.0508  |
| LPS(18:2)       | 0.3293   | 0.2808   | 0.2799   | 0.4642   | 0.4799   | 0.5890  |
| LPS(20:1)       | 0.7652   | 0.4583   | 0.4257   | 0.6844   | 0.6856   | 0.2818  |
| SO(d16:1)       | 1.4430   | 1.2550   | 0.7870   | 1.8760   | 1.3580   | 2.6220  |
| SO(d18:1)       | 2.7610   | 1.6880   | 1.1350   | 1.8410   | 2.1330   | 3.6300  |
| Cer(d18:1-16:0) | 0.2180   | 0.2590   | 0.4070   | ND       | ND       | ND      |
| Cer(d18:1-22:0) | 0.0710   | 0.0650   | 0.1080   | ND       | ND       | ND      |
| SM(d18:1-14:0)  | 0.0090   | 0.0090   | 0.0090   | ND       | ND       | ND      |
| SM(d18:1-16:0)  | 0.1960   | 0.2140   | 0.2070   | 0.0040   | 0.0120   | 0.0090  |
| SM(d18:1-18:0)  | 0.0380   | 0.0430   | 0.0380   | ND       | ND       | ND      |
| SM(d18:1-18:1)  | 0.0020   | 0.0030   | 0.0040   | ND       | ND       | ND      |
| SM(d18:1-20:0)  | 0.0400   | 0.0490   | 0.0430   | ND       | ND       | ND      |

|                 |        |        |        |        |        |        |
|-----------------|--------|--------|--------|--------|--------|--------|
| SM(d18:1-22:0)  | 0.0690 | 0.0690 | 0.0680 | ND     | ND     | ND     |
| SM(d18:1-24:0)  | 0.0340 | 0.0550 | 0.0390 | ND     | ND     | ND     |
| Cer(d18:1-18:2) | ND     | ND     | ND     | 0.0440 | 0.0320 | 0.0230 |
| SA(d16:0)       | ND     | ND     | ND     | 0.7540 | 0.7980 | 0.6530 |
| SA(d18:0)       | ND     | ND     | ND     | 0.3150 | 0.2650 | 0.2880 |

**Table S1.** The numbers were the calculated values of peak area for each lipid molecule detected by mass spectroscopy divided by internal standard.

## Supplementary table 2. Differentially regulated lipids (p-value < 0.05)

### Up-regulated in *P. acnes* EV (fold change > 1.5) compared to *P. acnes*

| No. | Compound Name      | Fold changes | Log <sub>2</sub> (Fold changes) | P-value   | -log <sub>10</sub> (P-value) |
|-----|--------------------|--------------|---------------------------------|-----------|------------------------------|
| 1   | ChE(18:2)          | 2.523        | 1.335                           | 1.54.E-02 | 1.813                        |
| 2   | dCer1P(d18:1-20:3) | 2.063        | 1.045                           | 2.98.E-02 | 1.525                        |
| 3   | DG(30:0)           | 7.993        | 2.999                           | 2.90.E-05 | 4.538                        |
| 4   | DG(30:1)           | 4.395        | 2.136                           | 4.70.E-05 | 4.328                        |
| 5   | DG(32:0)           | 2.284        | 1.192                           | 1.08.E-03 | 2.968                        |
| 6   | DG(32:1)           | 4.467        | 2.159                           | 7.05.E-04 | 3.152                        |
| 7   | DG(32:2)           | 17.895       | 4.162                           | 8.14.E-07 | 6.089                        |
| 8   | DG(34:1)           | 3.060        | 1.614                           | 5.87.E-03 | 2.232                        |
| 9   | DG(34:2)           | 4.906        | 2.295                           | 1.76.E-03 | 2.754                        |
| 10  | DG(34:3)           | 6.800        | 2.766                           | 7.35.E-04 | 3.134                        |
| 11  | DG(36:1)           | 3.148        | 1.655                           | 2.30.E-04 | 3.639                        |
| 12  | DG(36:2)           | 2.989        | 1.580                           | 3.85.E-03 | 2.415                        |
| 13  | DG(36:3)           | 3.044        | 1.606                           | 3.18.E-03 | 2.497                        |
| 14  | DG(36:4)           | 2.429        | 1.280                           | 2.61.E-03 | 2.584                        |
| 15  | DG(42:0)           | 1.530        | 0.614                           | 6.30.E-04 | 3.200                        |
| 16  | LPA(14:0)          | 2.229        | 1.157                           | 4.29.E-03 | 2.368                        |
| 17  | LPA(16:0)          | 1.755        | 0.811                           | 1.33.E-03 | 2.878                        |
| 18  | LPA(16:1)          | 1.951        | 0.964                           | 2.85.E-02 | 1.546                        |
| 19  | LPA(18:1)          | 1.617        | 0.693                           | 4.23.E-03 | 2.373                        |
| 20  | LPC(16:1)          | 5.368        | 2.425                           | 2.11.E-05 | 4.676                        |
| 21  | LPC(18:1)          | 5.917        | 2.565                           | 2.00.E-05 | 4.698                        |
| 22  | LPC(18:2)          | 2.143        | 1.100                           | 4.11.E-03 | 2.386                        |
| 23  | LPC(24:1)          | 1.625        | 0.700                           | 3.94.E-02 | 1.405                        |
| 24  | LPS(16:0)          | 1.539        | 0.622                           | 2.57.E-02 | 1.590                        |
| 25  | MG(18:2)           | 1.654        | 0.726                           | 3.36.E-02 | 1.473                        |
| 26  | MG(20:2)           | 1.863        | 0.898                           | 6.99.E-03 | 2.156                        |
| 27  | MG(22:5)           | 1.764        | 0.819                           | 9.03.E-03 | 2.044                        |
| 28  | PA(28:0)           | 24.350       | 4.606                           | 2.43.E-02 | 1.614                        |
| 29  | PA(30:0)           | 5.185        | 2.374                           | 2.91.E-02 | 1.536                        |
| 30  | PA(30:1)           | 83.065       | 6.376                           | 3.19.E-03 | 2.497                        |
| 31  | PA(32:0)           | 27.840       | 4.799                           | 2.46.E-02 | 1.610                        |
| 32  | PA(32:1)           | 34.856       | 5.123                           | 2.83.E-02 | 1.548                        |
| 33  | PA(34:1)           | 55.271       | 5.788                           | 4.08.E-02 | 1.389                        |
| 34  | PC(28:0)           | 45.750       | 5.516                           | 2.45.E-06 | 5.612                        |
| 35  | PC(28:1)           | 15.038       | 3.911                           | 1.77.E-05 | 4.753                        |
| 36  | PC(30:0)           | 16.373       | 4.033                           | 7.41.E-05 | 4.130                        |



|    |                |          |        |           |       |
|----|----------------|----------|--------|-----------|-------|
| 37 | PC(30:1)       | 1210.700 | 10.242 | 1.34.E-05 | 4.874 |
| 38 | PC(32:0)       | 6.096    | 2.608  | 1.32.E-05 | 4.881 |
| 39 | PC(32:1)       | 14.726   | 3.880  | 2.92.E-05 | 4.534 |
| 40 | PC(32:2)       | 65.000   | 6.022  | 9.66.E-08 | 7.015 |
| 41 | PC(34:0)       | 4.340    | 2.118  | 2.63.E-04 | 3.580 |
| 42 | PC(34:1)       | 20.158   | 4.333  | 1.38.E-06 | 5.860 |
| 43 | PC(34:2)       | 63.533   | 5.989  | 4.42.E-05 | 4.354 |
| 44 | PC(34:3)       | 7.818    | 2.967  | 7.57.E-07 | 6.121 |
| 45 | PC(36:0)       | 4.677    | 2.226  | 1.56.E-04 | 3.808 |
| 46 | PC(36:1)       | 23.323   | 4.544  | 3.78.E-04 | 3.423 |
| 47 | PC(36:2)       | 23.136   | 4.532  | 4.87.E-05 | 4.312 |
| 48 | PC(36:3)       | 14.833   | 3.891  | 2.90.E-05 | 4.538 |
| 49 | PC(36:4)       | 10.174   | 3.347  | 2.16.E-05 | 4.666 |
| 50 | PC(38:1)       | 62.190   | 5.959  | 6.95.E-08 | 7.158 |
| 51 | PC(38:2)       | 34.779   | 5.120  | 1.37.E-06 | 5.862 |
| 52 | PC(38:3)       | 15.667   | 3.970  | 1.25.E-07 | 6.902 |
| 53 | PC(38:4)       | 4.500    | 2.170  | 8.98.E-04 | 3.047 |
| 54 | PE(34:0)       | 2.333    | 1.222  | 1.61.E-02 | 1.792 |
| 55 | PE(34:1)       | 15.714   | 3.974  | 2.78.E-05 | 4.556 |
| 56 | PE(34:2)       | 163.330  | 7.352  | 1.13.E-06 | 5.948 |
| 57 | PE(36:1)       | 3.250    | 1.700  | 1.58.E-02 | 1.801 |
| 58 | PE(36:2)       | 20.800   | 4.379  | 3.52.E-04 | 3.454 |
| 59 | PE(36:3)       | 5.333    | 2.415  | 2.26.E-02 | 1.645 |
| 60 | PI(30:0)       | 26.438   | 4.725  | 1.67.E-06 | 5.778 |
| 61 | SAIP(d18:1)    | 24.197   | 4.597  | 2.23.E-02 | 1.651 |
| 62 | SM(d18:1-16:0) | 24.680   | 4.625  | 4.26.E-06 | 5.371 |
| 63 | TG(52:3)       | 1.510    | 0.595  | 3.71.E-03 | 2.431 |
| 64 | TG(54:3)       | 1.969    | 0.978  | 3.75.E-04 | 3.426 |
| 65 | TG(56:3)       | 1.828    | 0.871  | 4.83.E-03 | 2.316 |
| 66 | TG(56:4)       | 2.077    | 1.055  | 1.25.E-02 | 1.905 |
| 67 | TG(56:5)       | 1.942    | 0.957  | 2.51.E-02 | 1.600 |

**Down-regulated in *P.acnes* EV (fold change < 0.67) compared to *P. acnes***

| No. | Compound Name | Fold changes | Log <sub>2</sub> (Fold changes) | P-value   | -log <sub>10</sub> (P-value) |
|-----|---------------|--------------|---------------------------------|-----------|------------------------------|
| 1   | TG(44:0)      | 0.632        | -0.662                          | 7.35.E-03 | 2.134                        |
| 2   | TG(48:2)      | 0.599        | -0.740                          | 5.68.E-04 | 3.245                        |

|    |             |       |        |           |       |
|----|-------------|-------|--------|-----------|-------|
| 3  | LPG(22:2)   | 0.593 | -0.755 | 9.06.E-04 | 3.043 |
| 4  | SO1P(d18:1) | 0.592 | -0.757 | 2.84.E-02 | 1.547 |
| 5  | TG(42:0)    | 0.588 | -0.766 | 1.01.E-03 | 2.996 |
| 6  | LPS(18:2)   | 0.581 | -0.785 | 7.26.E-03 | 2.139 |
| 7  | TG(46:2)    | 0.546 | -0.872 | 5.87.E-04 | 3.231 |
| 8  | SA1P(d14:1) | 0.542 | -0.883 | 5.59.E-03 | 2.253 |
| 9  | TG(44:1)    | 0.502 | -0.994 | 2.66.E-05 | 4.576 |
| 10 | TG(50:4)    | 0.495 | -1.014 | 4.37.E-04 | 3.360 |
| 11 | TG(46:1)    | 0.461 | -1.117 | 3.15.E-05 | 4.501 |
| 12 | PS(34:3)    | 0.445 | -1.167 | 2.74.E-02 | 1.563 |
| 13 | LPI(18:3)   | 0.435 | -1.203 | 4.69.E-03 | 2.329 |
| 14 | PS(32:5)    | 0.375 | -1.413 | 4.30.E-02 | 1.367 |
| 15 | TG(48:3)    | 0.353 | -1.502 | 2.78.E-04 | 3.555 |
| 16 | PS(28:4)    | 0.340 | -1.557 | 5.52.E-03 | 2.258 |
| 17 | SO1P(d14:1) | 0.321 | -1.638 | 1.70.E-02 | 1.770 |

---
